# Supplementary material
Source: Research Square preprint supplement (doi:10.21203/rs.3.rs-9437708/v1)
Supplement: Supplementary file 1 [file c34e971960aff6b2705d77a9.docx]

Supplemental Table 1 – Seropositivity (HAI ≥ 40) and seroconversion (≥ 4-fold increase from baseline)

| *Group* | *Visit* | *Seropositive, n (%)* | *Seroconverted, n (%)* | *Seropositive, n (%)* | *Seroconverted, n (%)* |
| --- | --- | --- | --- | --- | --- |
|  | | *A-H1N1-2019 (2022/2023)* | | *A-H1N1-2022 (2023/2024)* | |
| TNF | Baseline | 0 (0) |  | 3 (16) |  |
|  | 7 days | 7 (50) | 9 (64) | 13 (76) | 14 (82) |
|  | 3 months | 5 (36) | 5 (36) | 13 (68) | 10 (53) |
|  | 6 months | 2 (15) | 3 (23) | 7 (44) | 8 (50) |
| MTX | Baseline | 1 (17) |  | 1 (12) |  |
|  | 7 days | 2 (33) | 2 (33) | 4 (57) | 4 (57) |
|  | 3 months | 3 (50) | 2 (33) | 6 (75) | 4 (50) |
|  | 6 months | 3 (50) | 2 (33) | 2 (33) | 2 (33) |
| HC | Baseline | 6 (46) |  | 7 (44) |  |
|  | 7 days | 10 (77) | 4 (31) | 16 (100) | 8 (50) |
|  | 3 months | 8 (62) | 2 (15) | 13 (87) | 6 (40) |
|  | 6 months | 8 (62) | 2 (15) | 9 (69) | 5 (38) |
|  | | *A-H3N2* | | *B (Victoria)* | |
| TNF | Baseline | 1 (3) |  | 3 (9) |  |
|  | 7 days | 9 (29) | 14 (45) | 18 (55) | 21 (66) |
|  | 3 months | 7 (22) | 10 (33) | 10 (31) | 11 (35) |
|  | 6 months | 4 (13) | 8 (28) | 5 (17) | 10 (34) |
| MTX | Baseline | 3 (21) |  | 1 (7) |  |
|  | 7 days | 7 (58) | 5 (42) | 7 (50) | 6 (43) |
|  | 3 months | 8 (57) | 7 (50) | 8 (62) | 9 (69) |
|  | 6 months | 7 (54) | 6 (46) | 5 (38) | 7 (54) |
| HC | Baseline | 6 (23) |  | 2 (7) |  |
|  | 7 days | 13 (46) | 8 (32) | 13 (48) | 17 (63) |
|  | 3 months | 10 (37) | 7 (29) | 5 (18) | 8 (29) |
|  | 6 months | 7 (28) | 7 (32) | 3 (12) | 8 (32) |

Supplemental Table 2 – Geometric mean HAI-titer (GMT), mean fold-difference from baseline (FD), mean SFC/106 PBMC and mean SFC/106 PBMC difference from baseline in TNF participants with IBD or inflammatory joint disease.

| *Group* | *Visit* | *GMT ±geom. SD* | *FC, mean ±SD* | *SFC/106 PBMC, mean ±SD* | *ΔSFC, mean ±SD* |
| --- | --- | --- | --- | --- | --- |
| *A-H1N1-2019 (2022/2023)* | | | | | |
| IBD | 1 | 7.1 ±2.5 | - | 21 ±22.2 | - |
|  | 2 | 32 ±2.9 | 4.5 ±3.3 | 24.4 ±37.1 | 3.2 ±25.2 |
|  | 3 | 25.4 ±5.1 | 3.6 ±5.9 | 8.4 ±6.1 | -6.3 ±15.1 |
|  | 4 | 11.3 ±3.4 | 1.6 ±3.1 | 12.7 ±14.5 | -6 ±15.1 |
| Rh. IMID | 1 | 7.3 ±2.4 | 1 ±1 | 34 ±74.2 | - |
|  | 2 | 58.7 ±7 | 8 ±6.4 | 57.2 ±58.9 | 5.8 ±34.5 |
|  | 3 | 17.4 ±5.3 | 2.4 ±4.6 | 21 ±17.3 | -17.3 ±68.7 |
|  | 4 | 8.8 ±4.8 | 1.5 ±3.7 | 12.8 ±11.7 | -37.1 ±79.6 |
| *A-H1N1-2022 (2023/2024)* | | | | | |
| IBD | 1 | 7 ±2.5 | - | 33.5 ±24 | - |
|  | 2 | 48.5 ±2.2 | 7 ±2.5 | 17.1 ±15.7 | -14.2 ±35.4 |
|  | 3 | 32 ±4 | 4.6 ±3.8 | 86.3 ±99.2 | 65 ±91.7 |
|  | 4 | 25.4 ±2.2 | 2.5 ±1.5 | 103.1 ±109.9 | 109 ±63.6 |
| Rh. IMID | 1 | 13.1 ±3.5 | 1 ±1 | 18.2 ±47.6 | - |
|  | 2 | 215.3 ±5.6 | 21.4 ±8.2 | 23.1 ±38.1 | 6.9 ±37.2 |
|  | 3 | 75.1 ±6.1 | 5.2 ±5.5 | 28.8 ±27.1 | 3.3 ±37.9 |
|  | 4 | 42.7 ±7 | 3.6 ±5.6 | 17.8 ±16.9 | -12.4 ±55.9 |
| *A-H3N2* | | | | | |
| IBD | 1 | 4 ±1 | - | 31.3 ±32.6 | - |
|  | 2 | 6.2 ±2.3 | 1.6 ±2.3 | 39.3 ±41.3 | 11.3 ±35.4 |
|  | 3 | 6.2 ±2.4 | 1.6 ±2.4 | 27.6 ±36.9 | -1.9 ±44 |
|  | 4 | 5.4 ±2 | 1.4 ±2 | 24 ±24.9 | -6.7 ±26.1 |
| Rh. IMID | 1 | 6.5 ±2.7 | 1 ±1 | 32.1 ±71.4 | - |
|  | 2 | 36.8 ±5.3 | 5.7 ±5.5 | 24.6 ±32.8 | -1.6 ±55.8 |
|  | 3 | 21.1 ±4.8 | 2.6 ±3.6 | 24.9 ±33.7 | -0.9 ±50.3 |
|  | 4 | 16 ±4.4 | 2.1 ±3.2 | 17.3 ±19.5 | -22 ±77.2 |
| *B (Victoria)* | | | | | |
| IBD | 1 | 5.7 ±2.1 | - | 73.9 ±69.8 | - |
|  | 2 | 23.4 ±3.5 | 3.7 ±3.5 | 138.8 ±163.3 | 77.9 ±117.7 |
|  | 3 | 13.9 ±3.4 | 2.2 ±3.6 | 100.8 ±101.3 | 31.7 ±50 |
|  | 4 | 11.8 ±3 | 2 ±2.9 | 61.8 ±57.9 | -16.2 ±79.2 |
| Rh. IMID | 1 | 8 ±3.7 | 1 ±1 | 29.6 ±51.2 | - |
|  | 2 | 53 ±4.5 | 6.6 ±5 | 78.4 ±72.2 | 49.5 ±52.8 |
|  | 3 | 22.3 ±5.1 | 2.7 ±3.8 | 46.7 ±48.8 | 18.3 ±51.8 |
|  | 4 | 13.5 ±4.3 | 1.8 ±3.3 | 35.8 ±30.2 | -1.8 ±53.9 |
| *A-M1* | | | | | |
| IBD | 1 | - | - | 39.1 ±35 | - |
|  | 2 | - | - | 40.1 ±61.1 | 15 ±69.1 |
|  | 3 | - | - | 29.3 ±35.1 | 0.2 ±25.4 |
|  | 4 | - | - | 30.8 ±26.2 | -8.9 ±14.6 |
| Rh. IMID | 1 | - | - | 12.6 ±37.5 | - |
|  | 2 | - | - | 16.3 ±19.5 | 4.7 ±37.2 |
|  | 3 | - | - | 12.5 ±19.4 | 3 ±29.1 |
|  | 4 | - | - | 18.5 ±23.5 | 6.4 ±45.1 |
| *B-M1* | | | | | |
| IBD | 1 | - | - | 39.1 ±35 | - |
|  | 2 | - | - | 40.1 ±61.1 | 15 ±69.1 |
|  | 3 | - | - | 29.3 ±35.1 | 0.2 ±25.4 |
|  | 4 | - | - | 30.8 ±26.2 | -8.9 ±14.6 |
| Rh. IMID | 1 | - | - | 12.6 ±37.5 | - |
|  | 2 | - | - | 16.3 ±19.5 | 4.7 ±37.2 |
|  | 3 | - | - | 12.5 ±19.4 | 3 ±29.1 |
|  | 4 | - | - | 18.5 ±23.5 | 6.4 ±45.1 |
